# Supplementary material
Source: Research Square preprint supplement (doi:10.21203/rs.3.rs-9128640/v1)
Supplement: Supplementary file 1 [file c964481da2450177421253f7.docx]

**Designing broad-spectrum antimicrobial peptides based on conditional feedback generation adversarial network**

Yannan Bin1,#, Zhaoyang Li1,#, Kanglin Wang2,* and Yansen Su3,*

1The Key Laboratory of Intelligent Computing and Signal Processing of Ministry of Education, School of Life Sciences and Medical Engineering, Anhui University, Hefei, Anhui 230601, China.

2 Knature Biopharmaceutical Co. Ltd., Hefei, Anhui 231100, China

3 School of Artificial Intelligence, Anhui University, Hefei, Anhui 230601, China.

#These authors contributed equally to this work.

*Corresponding authors: wna2011@mail.ustc.edu.cn (N. W.), wangkanglin@knb-pharma.com (K. W.), and suyansen@ahu.edu.cn (Y. S.).

# Supplementary Information:

**Contents**

**1 Supplementary Figures**

**Figure S1.** Schematic illustration of the module architecture in our proposed Conditional Feedback GAN (CFGAN).

**Figure S2.** Pathogen-specific targeting distribution of dataset_1.

**Figure S3.** FID scores under different noise levels.

**2 Supplementary Tables**

**Table S1.** Detailed implementation of hyperparameters used in the analysor.

**Table S2.** The bilayer and peptide-bilayer system composition.

**Table S3.** The top 20 peptides with the lowest predicted antimicrobial activity against *E. coli*.

**Table S4.** The top 20 peptides with the lowest predicted antimicrobial activity against *S. aureusi*.

1. **Supplementary Figures**


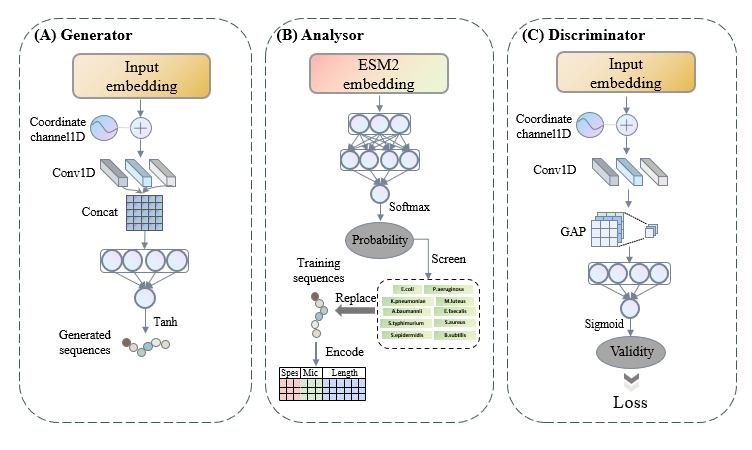


**Figure S1.** Schematic illustration of the module architecture in our proposed Conditional Feedback GAN (CFGAN). (A) Generator: Takes noise and conditional input (via coordinate channel embedding), applies 1D convolution and concatenation, followed by a stack of fully connected (linear) layers to model sequence-level dependencies, and outputs antimicrobial peptide sequences through a Tanh activation function. (B) Analysor: Utilizes a pretrained ESM2 model to extract functional embeddings, which are passed through linear layers to obtain softmax-based multi-label antimicrobial activity predictions. High-activity sequences are selected to replace training samples, while species, MIC, and length features are encoded to enable feedback reinforcement. (C) Discriminator: Similar to the Generator’s front end, it processes input sequences through 1D convolution, coordinate embedding, and a Global Average Pooling (GAP) layer, followed by linear layers and a final sigmoid unit to predict the validity score, which guides adversarial training.


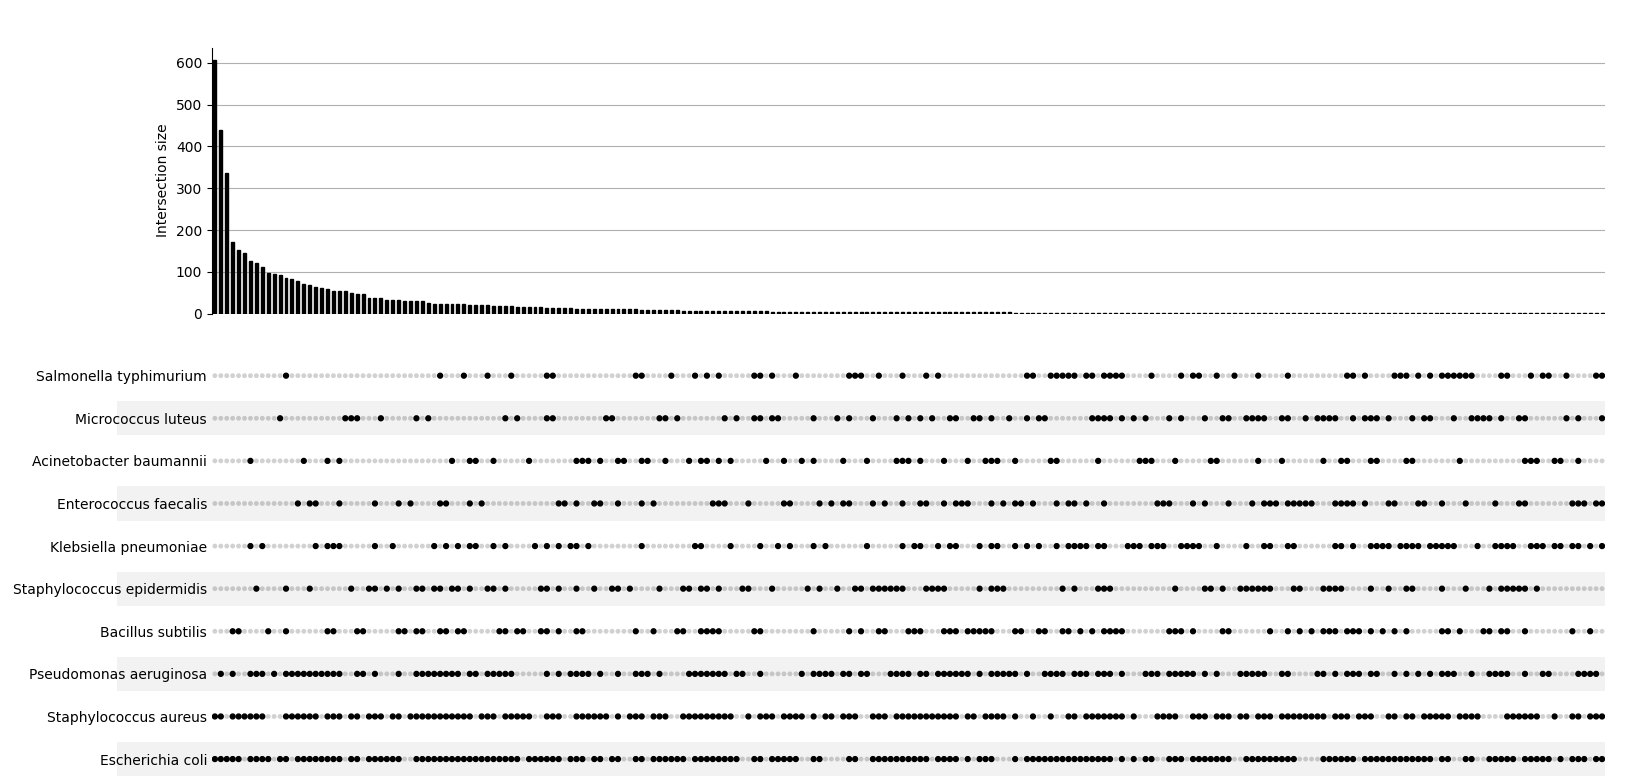


**Figure S2.** Pathogen-specific targeting distribution of dataset_1. The scatter plot shows which species the antibacterial peptide is active against, and the bar plot shows the number of antibacterial peptides that are active against the combination of the target species.


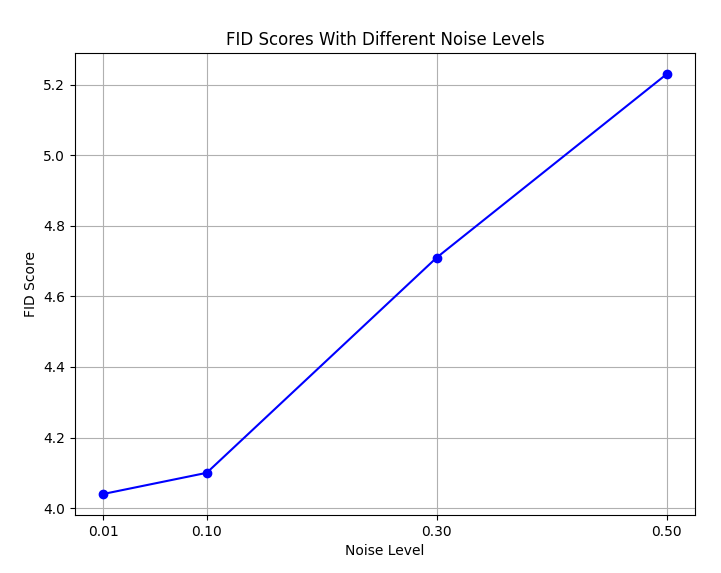


**Figure S3.** FID scores under different noise levels. As the noise level increases from 0.01 to 0.50, the FID score rises significantly, indicating a growing distributional discrepancy between generated and real peptide sequences. This result demonstrates that PepFID is sensitive to input perturbations and effectively reflects sequence quality.

**2 Supplementary Tables**

**Table S1.** Detailed implementation of hyperparameters used in the analysor

| Layer | Type | Shape | Activation function | Batch normalization | Dropout |
| --- | --- | --- | --- | --- | --- |
| 0 | Embedding | (None, 320) | None | None | None |
| 1 | Dense | (None, 256) | LeakyReLU | Yes | 0.2 |
| 2 | Dense | (None, 128) | LeakyReLU | Yes | 0.2 |
| 3 | Dense | (None, 64) | LeakyReLU | Yes | 0.2 |
| 4 | Dense | (None, 2) | Softmax | No | 0.2 |

| Membrane | Lipids | | | | Water | SOD | CLA | Ion concentration | Lipid area | Peptide area | Distance |
| --- | --- | --- | --- | --- | --- | --- | --- | --- | --- | --- | --- |
| POPE | POPG | TOCL1 | POPC |
| *E. coli* | 62 | 12 | 4 | 0 | 2.25 | 21 | 12 | 0.15 | 2447 | 241 | 3nm |
| *S. aureus* | 0 | 46 | 32 | 0 | 2.25 | 89 | 16 | 0.15 | 3443.6 | 191.4 | 3nm |

**Table S2.** The bilayer and peptide-bilayer system composition.

**Table S3.** The top 20 peptides with the lowest predicted antimicrobial activity against *E.coli*.

| **Sequence** | **E.coli** | **S.aureus** | **Ec.Activity** | **Sa.Activity** |
| --- | --- | --- | --- | --- |
| KWKKWLKCIWKRVAKKIL | Yes | Yes | 3.1775 | 3.36856 |
| KWKRIIQKPFKGVKKVTNGAIAIHL | Yes | Yes | 3.2317 | 7.0018 |
| IGKLLVKKISKVIKCRNWRRAAKKTL | Yes | Yes | 3.34105 | 6.5712 |
| WGRWQRRILARVQATGKVRKIAKKLIGKIAKNG | Yes | Yes | 3.4420 | 6.5643 |
| RLNRVCRWIRKVLKTGIRR | Yes | Yes | 3.5028 | 7.6995 |
| WARKLLKKLAKLISKIIERKVR | Yes | Yes | 3.5586 | 5.9710 |
| KWLHTILKVKGIGKKLK | Yes | Yes | 3.6162 | 7.8201 |
| GVCKIIKRLGKVAKILFAKKLWKKLSGKIKKFR | Yes | Yes | 3.7058 | 6.4333 |
| GWWRKIKILKRFKKNLTKGKTRKKVIGKILFKK | Yes | Yes | 3.7067 | 8.9454 |
| GIKKKLRRWGKFAKVLLTAKIRPKLFGCIVRPGAYKK | Yes | Yes | 3.7650 | 5.4035 |
| SLKRKIKIAAKVAKRLKAYKPRPQRAGKISGTGAYCICRILHMLK | Yes | Yes | 3.7760 | 8.0782 |
| WAKPPKKIRAKVRCFKGLWKIRPKVAGKILKKGATKI | Yes | Yes | 3.8029 | 8.5788 |
| ALKKLLKKLAKVFAKRM | Yes | Yes | 3.9274 | 10.5385 |
| GWFKTVKKIGKKIKNWLYHPIRPKKSRKITVKGAQ | Yes | Yes | 3.9560 | 6.8421 |
| KWKLAKKALKPIK | Yes | No | 3.9786 |  |
| KKKKLLKKLLKPSAKLIYAKVIIRNFG | Yes | No | 4.0039 |  |
| VNWKQIKKIKDFRKVVIMGKLNAKLHKK | Yes | Yes | 4.0288 | 11.8963 |
| GIASLLKKFLKKIAKNIKGRIAKKL | Yes | Yes | 4.0638 | 6.5778 |
| AKKKWRHRMWKTWSNLGIWKVAKKE | Yes | Yes | 4.0797 | 8.3196 |
| RWGRKIGHAGRGAKMLVTYHPRPCFAGKIVGVGASCICKPHH | Yes | Yes | 4.0805 | 6.4337 |

**Table S4.** The top 20 peptides with the lowest predicted antimicrobial activity against *S. aureusi*.

| **Sequence** | **E.coli** | **S.aureus** | **Ec.Activity** | **Sa.Activity** |
| --- | --- | --- | --- | --- |
| KWKKWLKCIWKRVAKKIL | Yes | Yes | 3.1775 | 3.3685 |
| WRKIAKKRFWKLVPKWVI | Yes | Yes | 5.1572 | 3.4182 |
| RLRRWRWALKWVK | No | Yes |  | 3.7491 |
| KWKRWFKWLRRWV | Yes | Yes | 7.2419 | 3.7686 |
| RRWRRWLRLARIKKL | No | Yes |  | 3.8958 |
| LKKLFRLWRLKKIWKKIL | No | Yes |  | 4.1526 |
| IWKFWWKKVALRIW | No | Yes |  | 4.1546 |
| FWWRVFVKVAKKI | Yes | Yes | 10.3222 | 4.2815 |
| GLLAIKKWLKRLPHLV | Yes | Yes | 6.1486 | 4.4707 |
| RWKRRWRRW | No | Yes |  | 4.4867 |
| FIWKLIPKIIGRVL | Yes | Yes | 13.2618 | 4.7132 |
| GLIKLIKKLLKFIKKL | Yes | Yes | 8.6806 | 4.8173 |
| GKCAKFCRAGKVAPRPGYWHTRPCIAGFIVGCGATCICRIHHML | Yes | Yes | 5.0980 | 4.8342 |
| KRKWWWKKKWKK | No | Yes |  | 4.8596 |
| WWKKKIGTVFSVIFLVCFGKIAAKRL | Yes | Yes | 7.8390 | 4.9349 |
| RWRRLLRRLLSGIAPYLQKKFWHHL | Yes | Yes | 4.2127 | 5.0056 |
| KRRWRRRWR | No | Yes |  | 5.1761 |
| AWRWPVKIFAKGAKILGPLQPRPCVAGKFVGQGAYCICRIHHMLK | Yes | Yes | 4.9229 | 5.2108 |
| FLLKWVLKIIARCRLV | Yes | Yes | 10.8851 | 5.2754 |
| GWFCPVKKVGKVAKILVTAKIRKKLAKKFLGLGAQCV | Yes | Yes | 5.1420 | 5.2931 |
